# Supplementary material for: Maintenance of respiratory chain function in mouse hearts with severely impaired mtDNA transcription
Source: PubMed Central journal article supplement — Nucleic Acids Res. 2010 Jun 20;38(19):6577–88. doi: 10.1093/nar/gkq527 (PMC2965244; doi:10.1093/nar/gkq527), 2010-06-20
Supplement: supp_gkq527_Freyer_et_al_Fig_S1-4.pdf [file supp_gkq527_Freyer_et_al_Fig_S1-4.pdf]

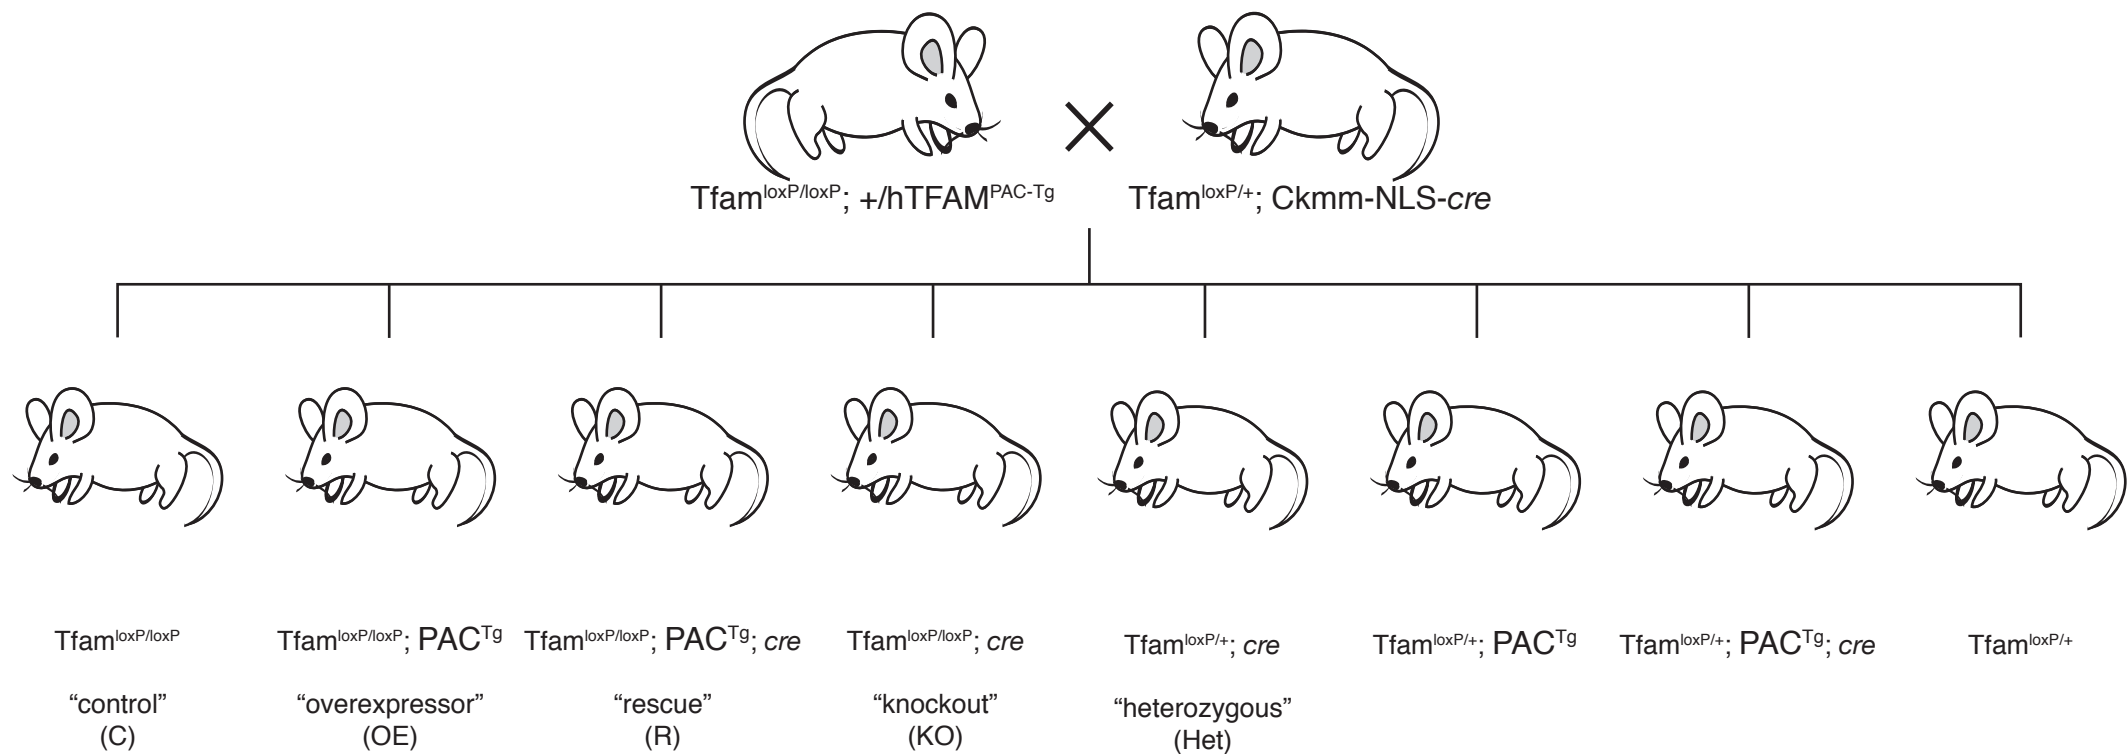

**Figure S1:** Schematic breeding scheme used. Floxed *Tfam* mice, containing the hTFAM PAC transgene were crossed to heterozygous floxed *Tfam* mice, expressing *cre* recombinase from the *Ckmm* promoter. The offspring could be genotyped into:  $Tfam^{loxP/loxP}$ ;  $Tfam^{loxP/+}$ ;  $Tfam^{loxP/loxP}; PAC^{Tg}$ ;  $Tfam^{loxP/+}; PAC^{Tg}$ ;  $Tfam^{loxP/loxP}; cre$ ;  $Tfam^{loxP/+}; cre$ ;  $Tfam^{loxP/loxP}; PAC^{Tg}; cre$ ; and  $Tfam^{loxP/+}; PAC^{Tg}; cre$ .

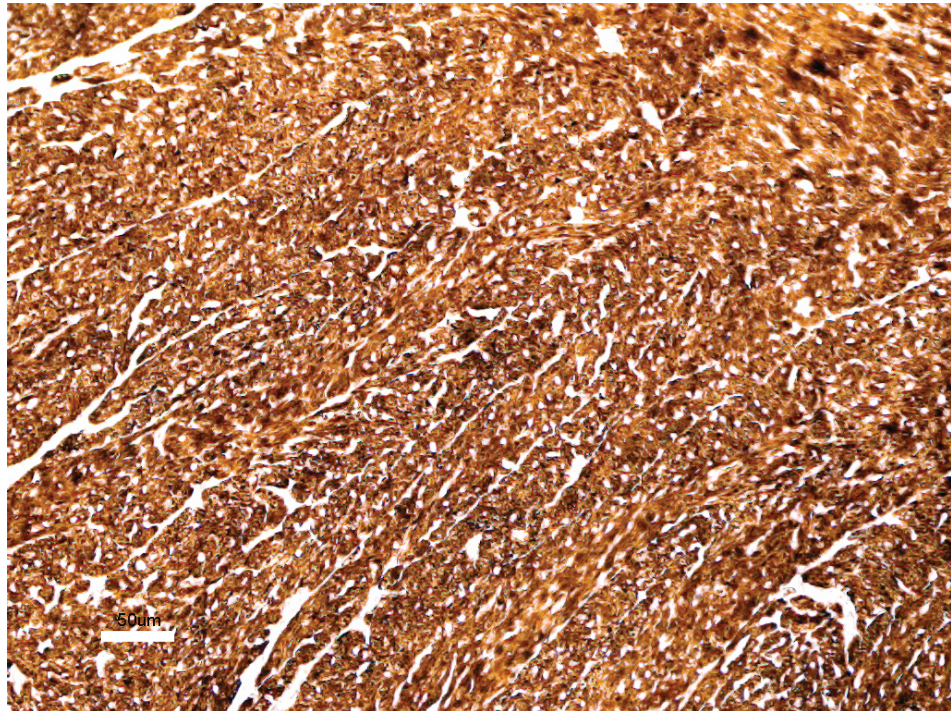

10um section at 10x magnification of heart tissue from a 28 week-old control animal. Size bar in 50 $\mu$ m.

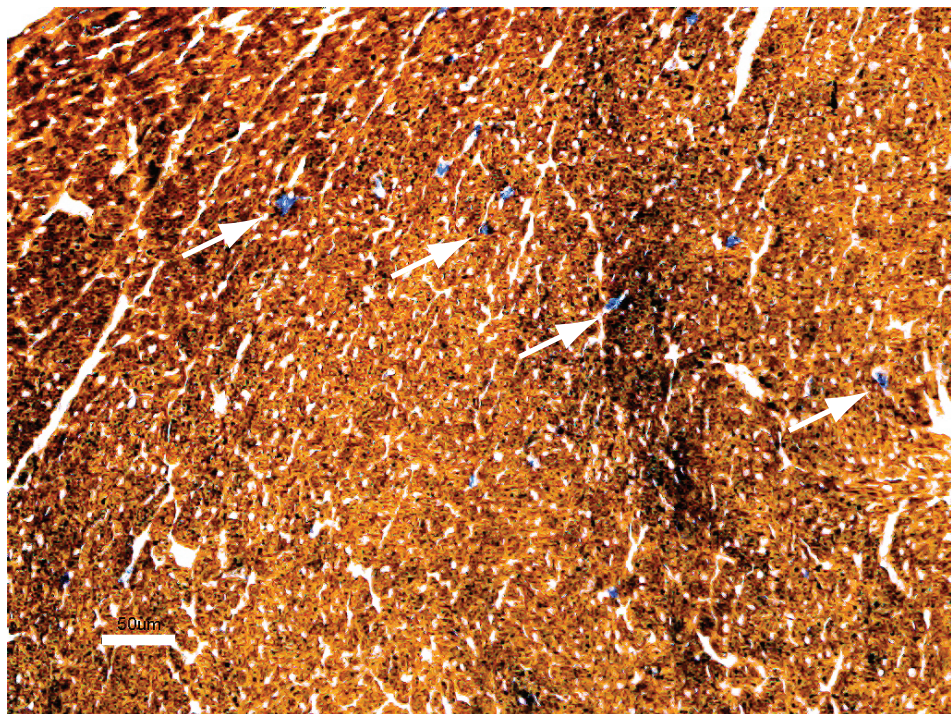

10um section at 10x magnification of heart tissue from a 28 week-old rescue animal. COX-deficient cells are shown in blue (arrows). Size bar in 50 $\mu$ m.

### Mitochondrial ATP production rate versus kg of muscle

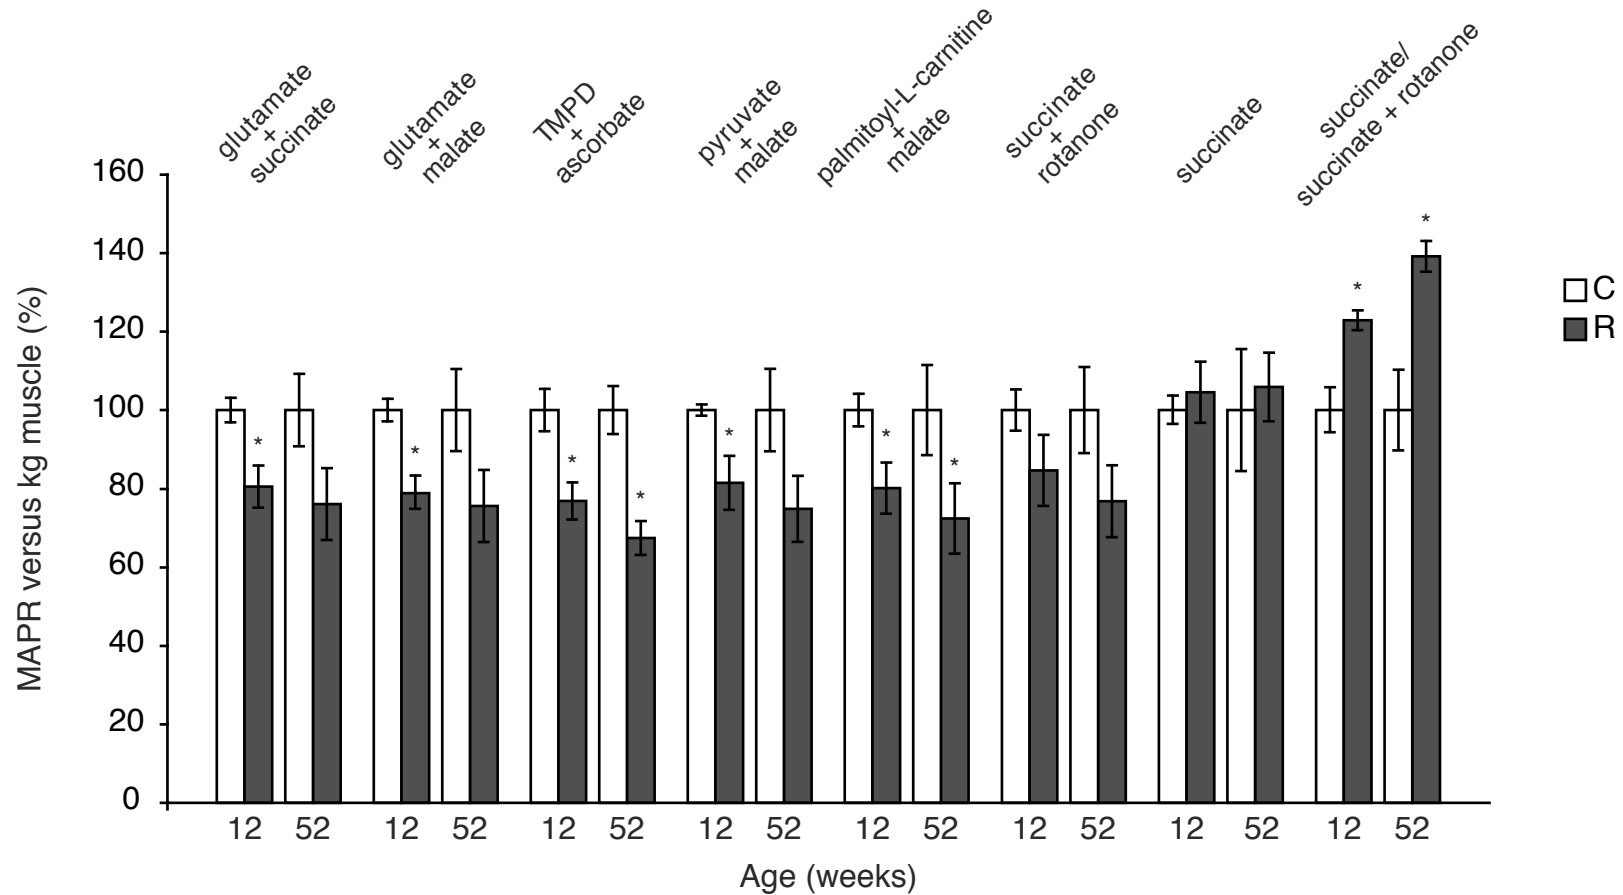

**Figure S2.** Results from measurements of MAPR per kg of heart tissue of control (white bars) and rescue (dark bars) mice at 12 and 52 weeks of age. The relative MAPR per kg of tissue are presented as 100% to control. N=5 for all samples, except control animals at 52 weeks, where 4 samples were included. Data are presented as means  $\pm$  SEM percentage of controls; \* is  $P < 0.05$ .



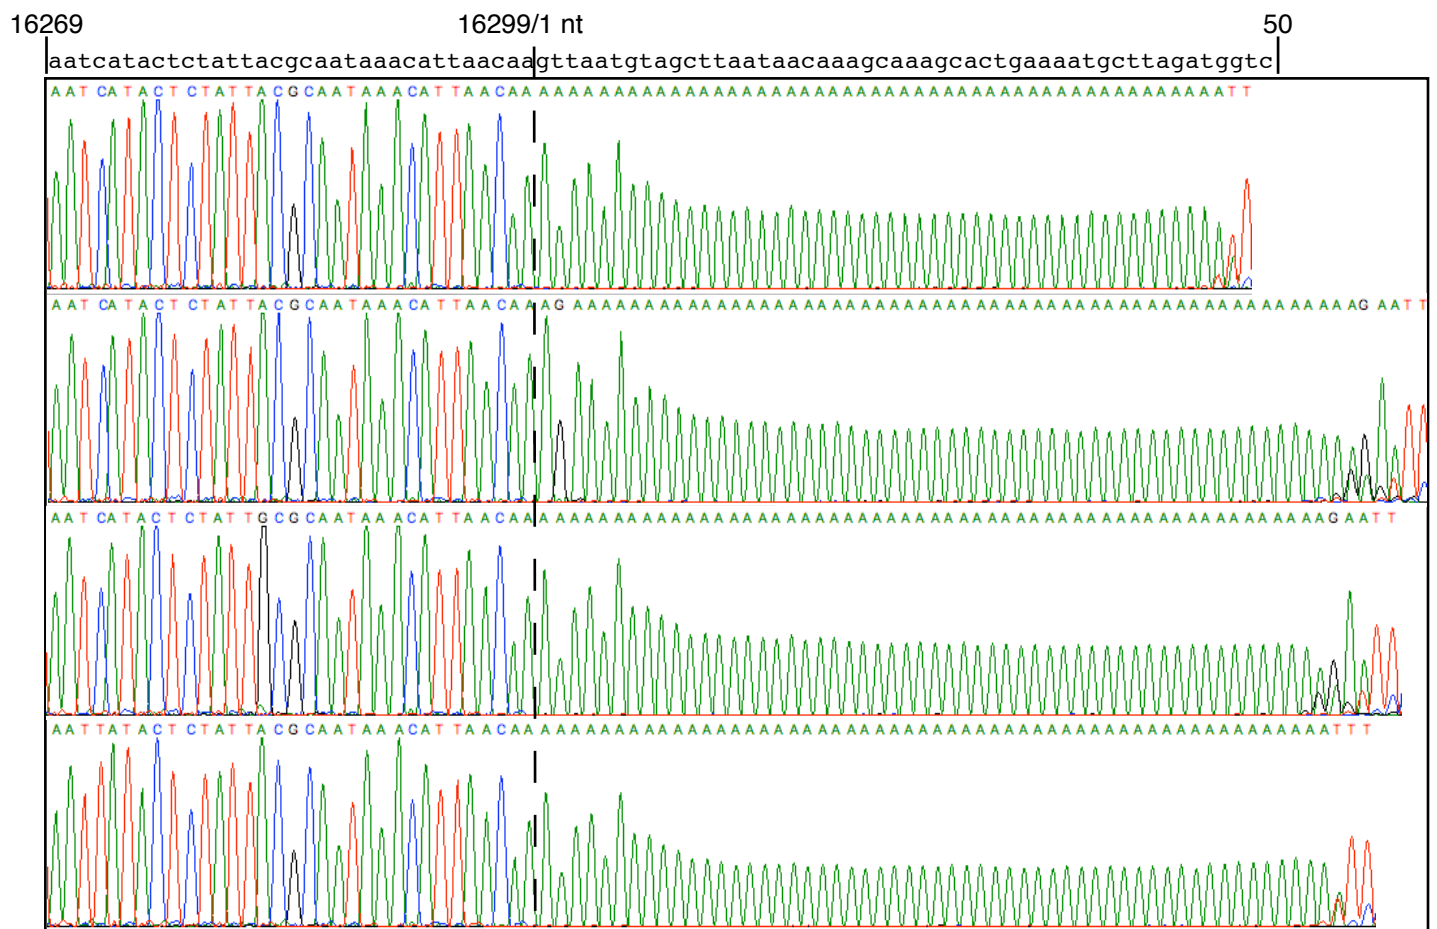

**Figure S4.** Electropherogram of 4 representative sequences obtained from 3' RACE experiments of the anti-control region transcript. Sequence and nucleotide position of the corresponding mouse mtDNA sequence are given in black.
